# Supplementary material for: Chronic Hepatitis C Pathogenesis: Immune Response in the Liver Microenvironment and Peripheral Compartment
Source: PubMed Central journal article supplement (PMC8369367; doi:10.3389/fcimb.2021.712105), 2021-08-03
Supplement: Presentation_2.pdf [file Presentation_2.pdf]

## *Supplementary Figures and tables*

Supplementary Figures 1-5

Supplementary Tables 1 and 2

Supplementary Table 3 shows the data set analyzed during the current study, but as it is an Excel file, is attached as a separate file.

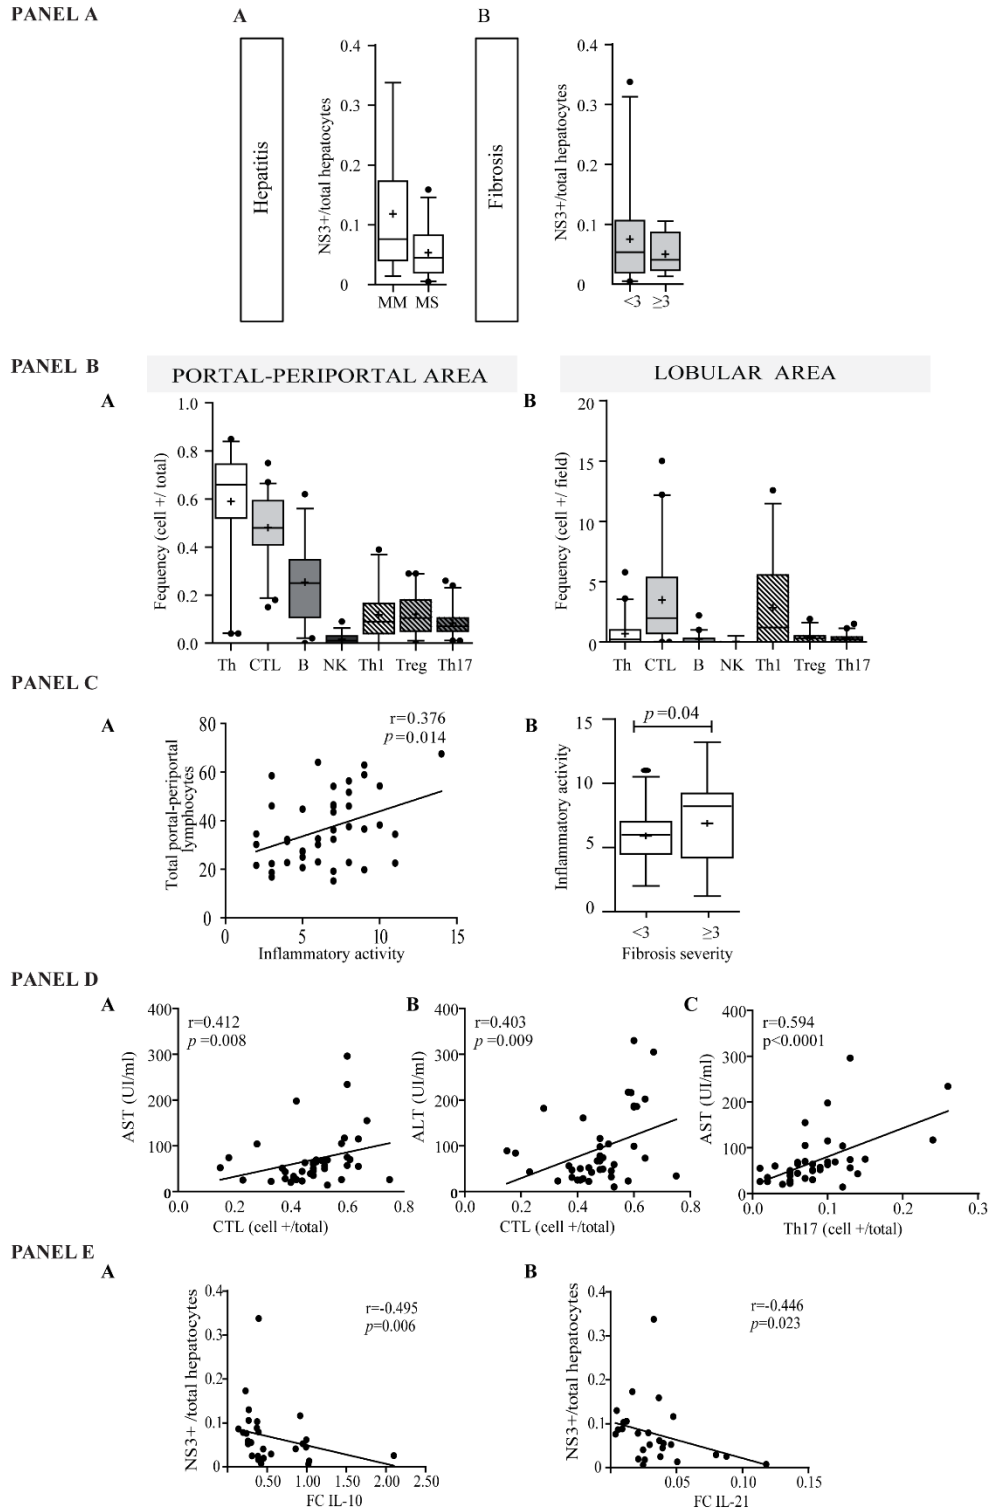

**SUPPLEMENTARY FIGURE 1. PANEL A. Infected hepatocytes in liver biopsies of CHC patients. NS3+ hepatocyte related to hepatitis (A) and fibrosis (B). PANEL B. Frequency and distribution of the immune cells within liver infiltrate. Portal-periportal (A) and lobular (B) cell population frequencies. PANEL C. Inflammatory activity related to total portal-periportal lymphocyte and fibrosis severity. Correlation between inflammatory activity and total porta-periportal lymphocytes**

(A). Inflammatory activity in relation to fibrosis severity (B). **PANEL D. Relationship between portal-periportal CTL and Th17 frequency and biochemical parameters of liver damage.** Correlations between aspartate transaminase (AST) or alanine transaminase (ALT) levels and CTL frequency (A and B) and Th17 frequency (C). **PANEL E. Relationship between liver infection and the expression of IL-10 and IL-21.** Correlation between infected hepatocytes (NS3+) and the hepatic expression levels of IL-10 (A) and IL-21 (B). FC: fold change. When it corresponds, the results are depicted in box plots. Horizontal lines within boxes indicate medians. Horizontal lines outside the boxes represent the 5 and 95 percentiles. Mean is indicated as +. MM: minimal – mild, MS: moderate – severe hepatitis. Advanced fibrosis ( $F \geq 3$ ) according to METAVIR. Mann-Whitney U test and Spearman's nonparametric correlation were used to compare data sets.

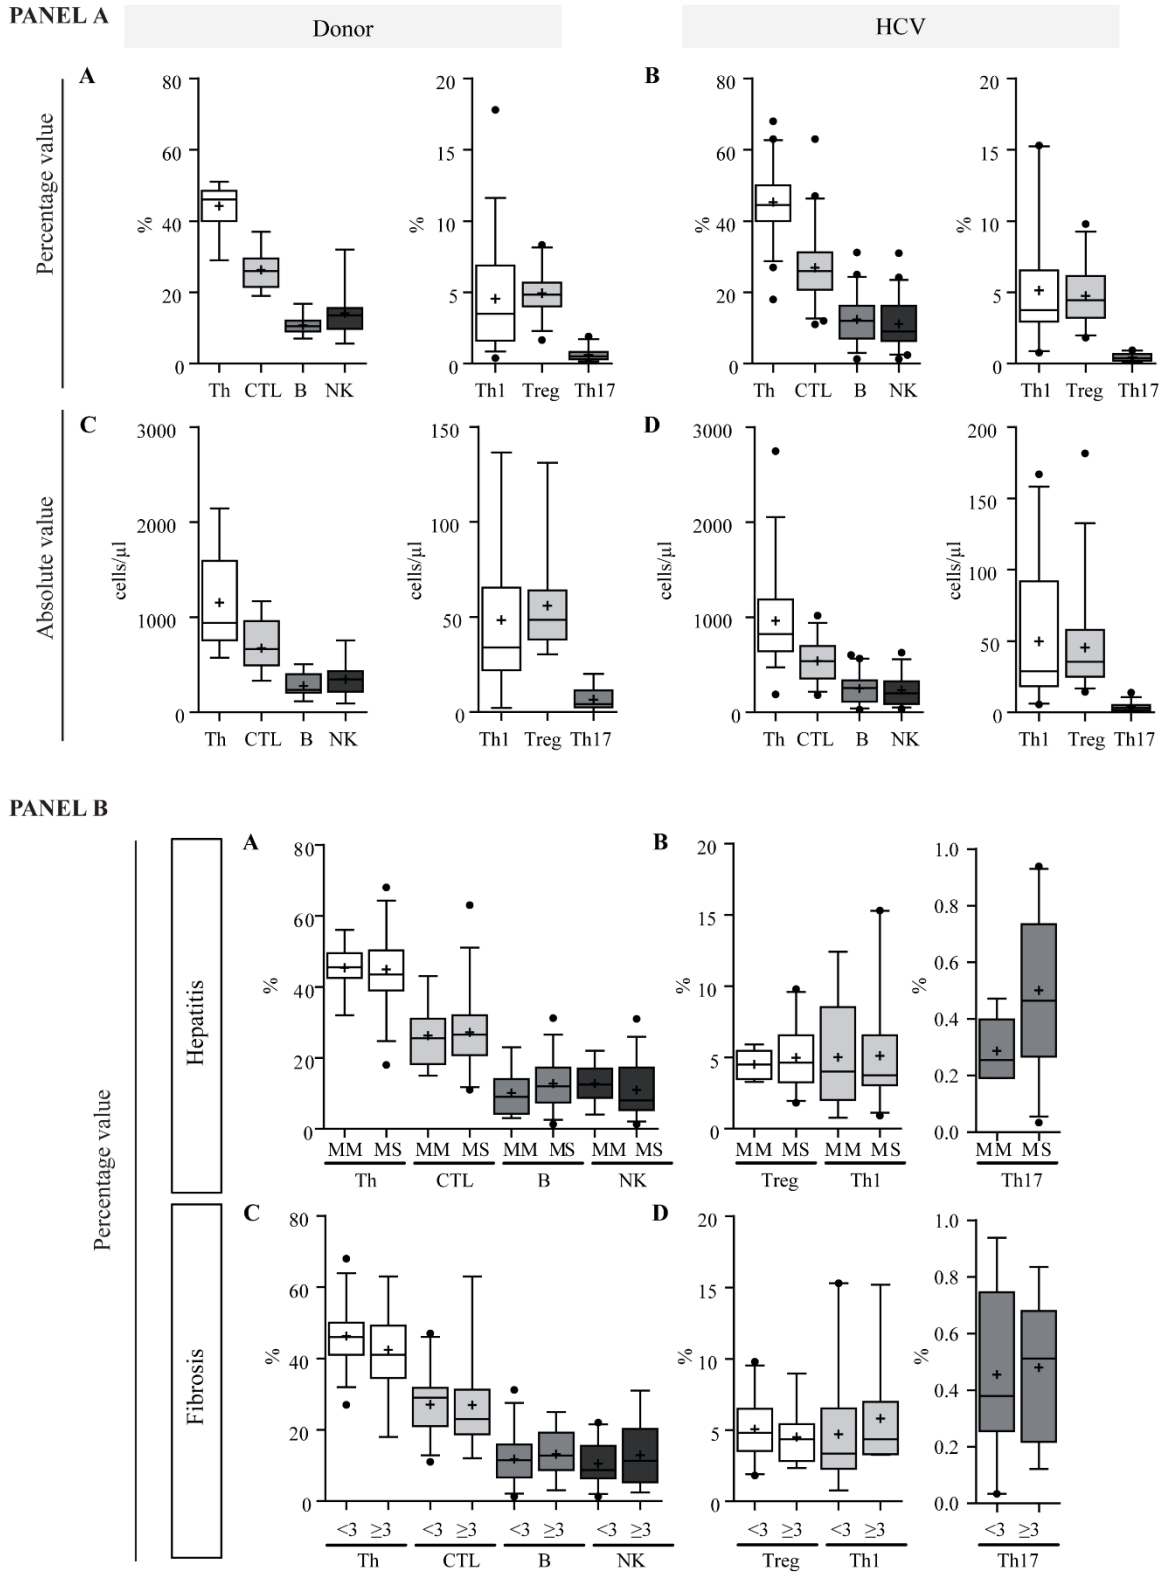

**SUPPLEMENTARY FIGURE 2. PANEL A. Peripheral cell populations profile in patients and donors.** Percentage (upper) and absolute (lower) values of peripheral cell populations in donors (A, C) and patients (B, D). **PANEL B. Peripheral cell populations related to liver damage.** Percentage

values related to hepatitis (A, B) and fibrosis (C and D) severity. MM: minimal – mild, MS: moderate – severe hepatitis. Advanced fibrosis ( $F \geq 3$ ) according to METAVIR. The results are depicted in box plots. Horizontal lines within boxes indicate medians. Horizontal lines outside the boxes represent the 5 and 95 percentiles. Mean is indicated as +. Mann-Whitney U test was applied to compare data sets.

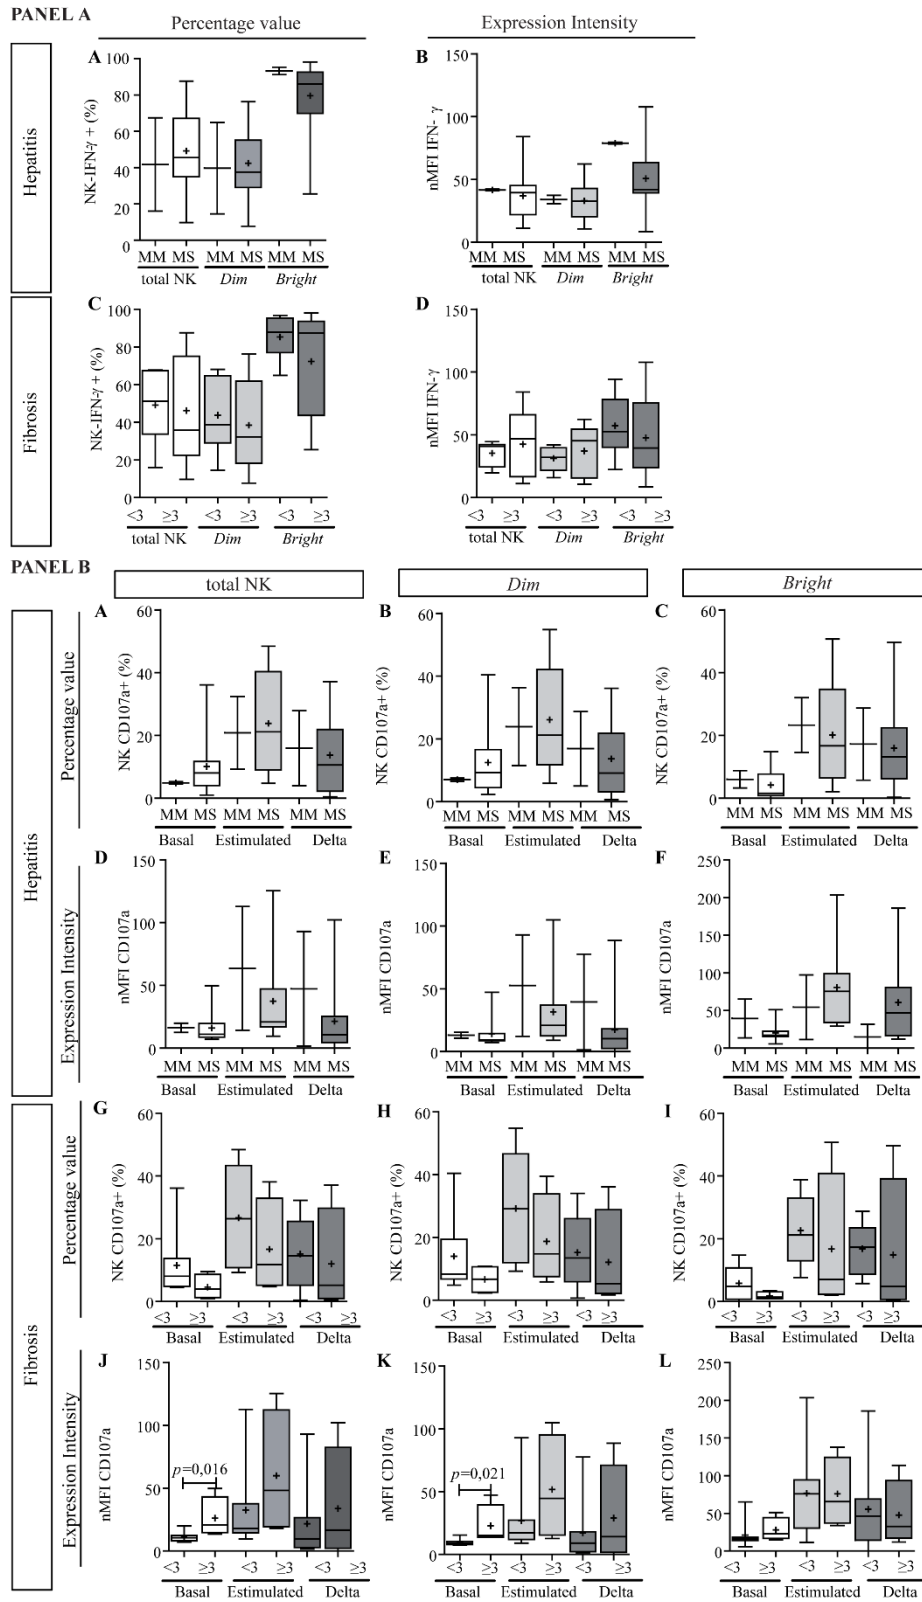

**SUPPLEMENTARY FIGURE 3. NK functionality related to liver damage. PANEL A. IFN $\gamma$  production capacity of NK cells related to hepatitis (A, B) and fibrosis (C, D) severity. Percentage values (A, C) and intensity of expression (B, D). PANEL B. Degranulation activity of NK cells**

**related to hepatitis (A-F) and fibrosis (G-L).** CD107a expression in total NK cells (left), NK Dim (middle) and NK Bright (right). Percentage values (A-C, G-I) and intensity of expression (D-F, J-L). MM: minimal – mild, MS: moderate – severe hepatitis. Advanced fibrosis ( $F \geq 3$ ) according to METAVIR. The results are depicted in box plots. Horizontal lines within boxes indicate medians. Horizontal lines outside the boxes represent the 5 and 95 percentiles. Mean is indicated as +. Mann-Whitney U test was applied to compare all data sets. *Note: the analysis of CD107a expression absolute values yielded results similar to the percentage values, but it is not shown to simplify their visualization.*

PANEL A

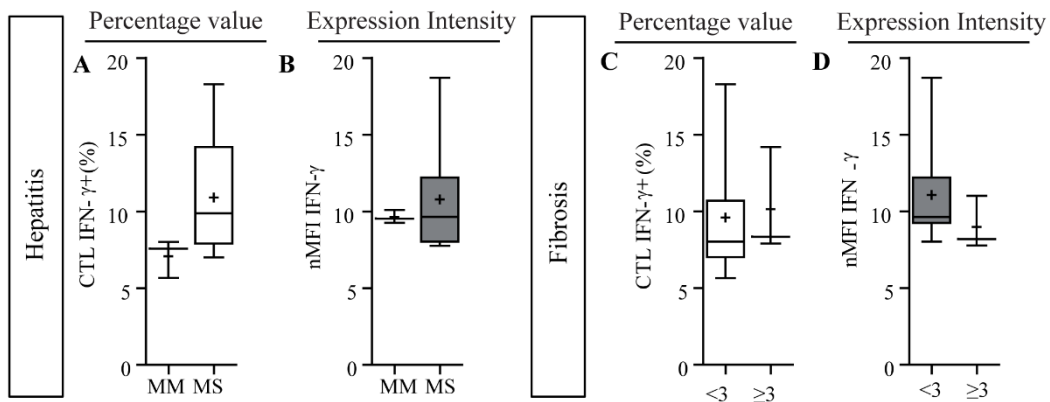

PANEL B

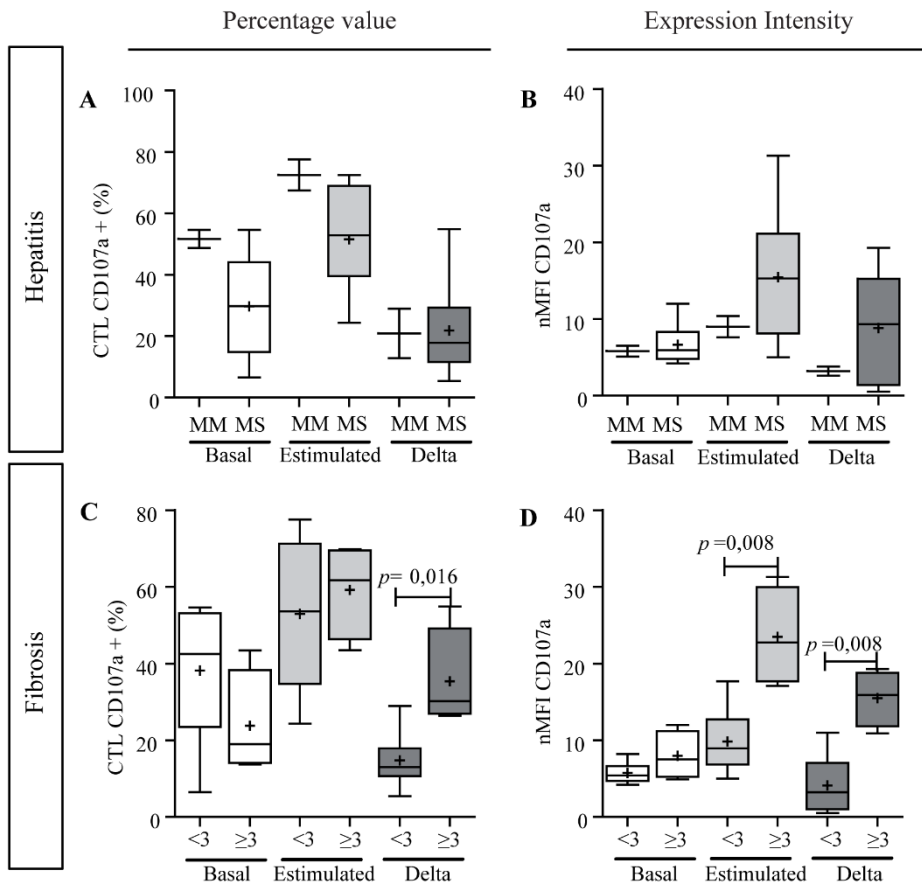

**SUPPLEMENTARY FIGURE 4. PANEL A. CTLs functionality related to liver damage. IFN- $\gamma$  production capacity of CTLs related to hepatitis (A, B) and fibrosis (C, D) severity.** Percentage values (A, C) and intensity of expression (B, D). **PANEL B. Degranulation activity of CTLs related to hepatitis (A, B) and fibrosis (C, D).** Percentage values (A, C) and intensity of expression (B, D). MM: minimal – mild, MS: moderate – severe hepatitis. Advanced fibrosis ( $F \geq 3$ ) according to METAVIR. The results are depicted in box plots. Horizontal lines within boxes indicate medians. Horizontal lines outside the boxes represent the 5 and 95 percentiles. Mean is indicated as +. Mann-Whitney U test was used to compare all data sets. *Note: the analysis of CD107a expression absolute values displayed similar results to the percentage values, but it is not shown to simplify their visualization.*



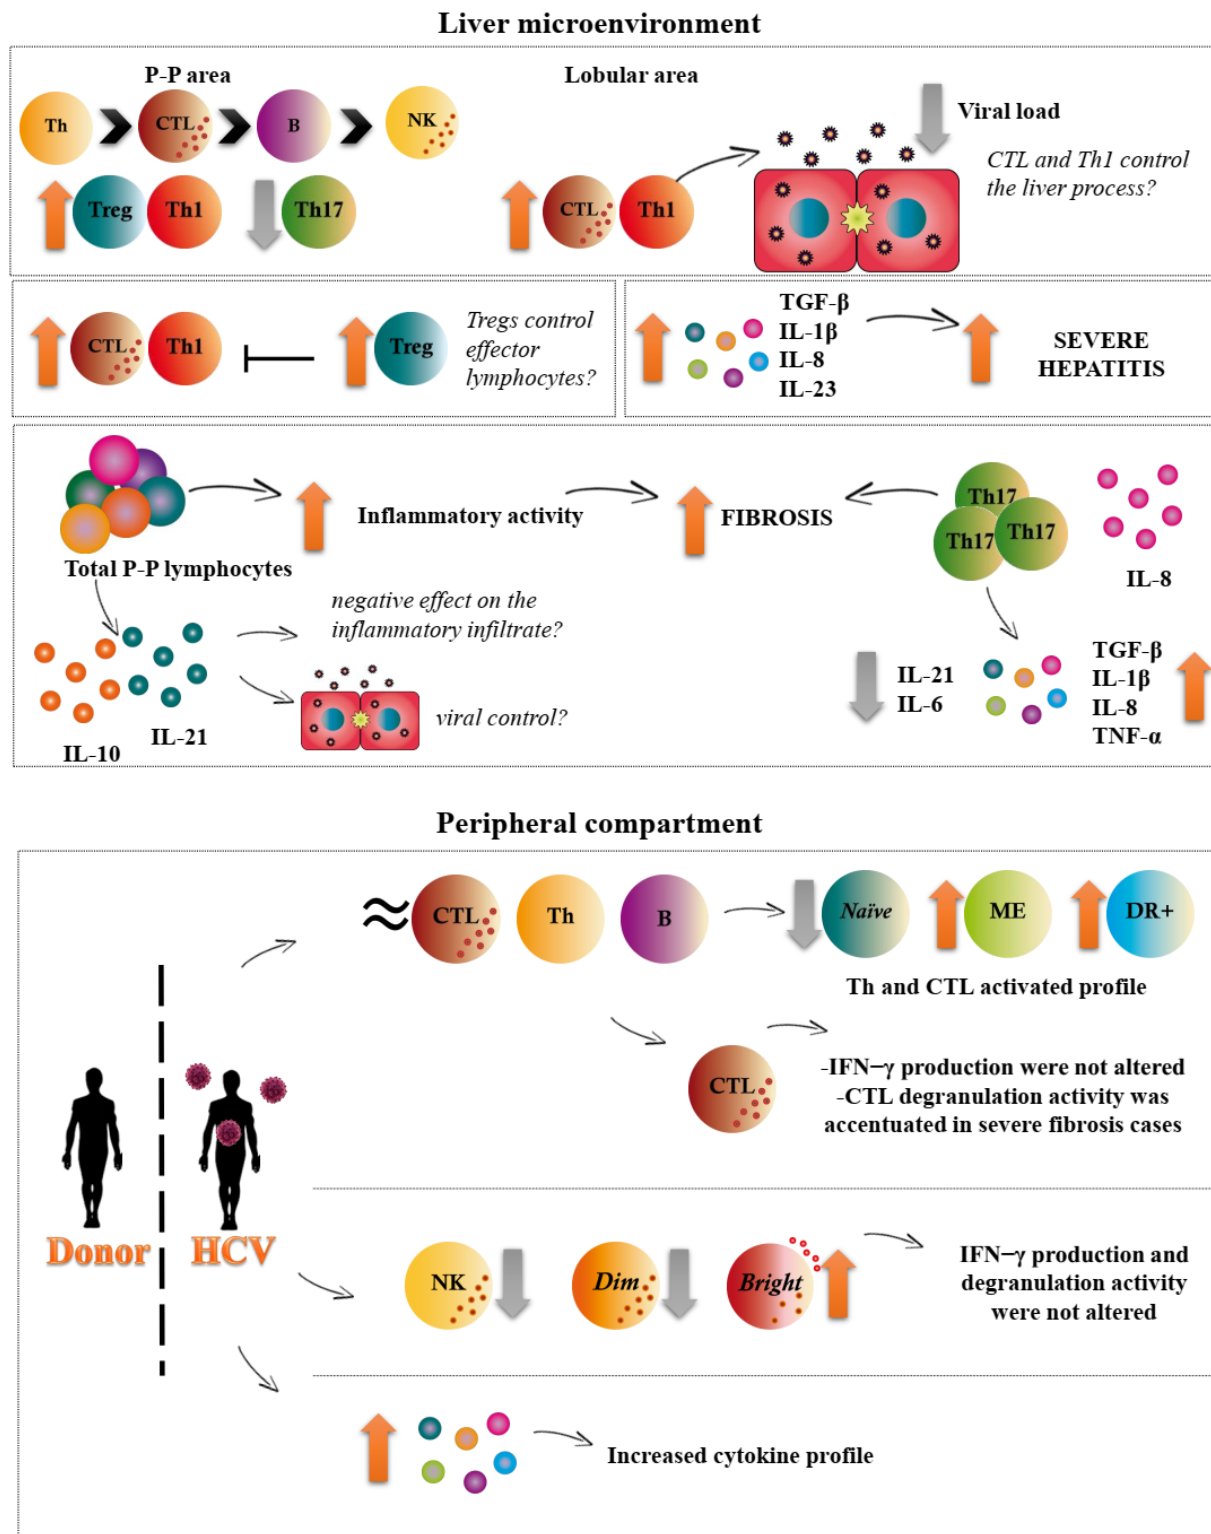

SUPPLEMENTARY FIGURE 5. Schematic representation of the results

**SUPPLEMENTARY TABLE 1. Clinical, biochemical, virological and histological patient features.**

| <b>Patients</b> | <b>Gender</b> | <b>Age (ys)</b> | <b>AST (UI/L)</b> | <b>ALT (UI/L)</b> | <b>Viral genotype</b> | <b>Viral load (UI/ml)</b> | <b>Risk factor for HCV infection</b> | <b>Knodell (HAI)</b> | <b>METAVIR (A-F)</b> |
|-----------------|---------------|-----------------|-------------------|-------------------|-----------------------|---------------------------|--------------------------------------|----------------------|----------------------|
| <b>1</b>        | F             | 54              | 64                | 78                | 1b                    | 1 150 000                 | T                                    | 6 (3+3)              | 1-3                  |
| <b>2</b>        | M             | 57              | 65                | 74                | 1b                    | 1 832 723                 | OE                                   | 10 (6+4)             | 1-3                  |
| <b>3</b>        | M             | 49              | 30                | 50                | 1a                    | 48 800                    | DA                                   | 3 (2+1)              | 1-1                  |
| <b>4</b>        | M             | 64              | 33                | 25                | 1a                    | 98 797                    | Ta                                   | 7 (5+2)              | 1-2                  |
| <b>5</b>        | F             | 57              | 68                | 104               | 1b                    | 1 632 520                 | D                                    | 9 (7+2)              | 2-2                  |
| <b>6</b>        | F             | 63              | 26                | 34                | 1b                    | 12 535                    | T                                    | 7 (5+2)              | 2-2                  |
| <b>7</b>        | M             | 50              | 69                | 59                | 1a                    | 25 634                    | D                                    | 14 (9+5)             | 2-3                  |
| <b>8</b>        | F             | 56              | 50                | 32                | 3a                    | 1 120 040                 | D                                    | 8 (2+6)              | 1-4                  |
| <b>9</b>        | F             | 69              | 198               | 161               | 1a                    | 382 702                   | H                                    | 5 (2+3)              | 1-2                  |
| <b>10*</b>      | M             | 46              | 173               | 254               | 1a                    | 156 123                   | DA                                   | ND                   | ND                   |
| <b>11</b>       | F             | 48              | 45                | 98                | 2                     | 123 452                   | D                                    | 11 (10+1)            | 2-1                  |
| <b>12</b>       | M             | 48              | 75                | 185               | 1a                    | 2190 885                  | DA                                   | 7 (5+2)              | 1-1                  |
| <b>13*</b>      | F             | 51              | 130               | 146               | 3a                    | 698 705                   | S                                    | ND                   | ND                   |
| <b>14</b>       | M             | 35              | 105               | 217               | 1a                    | 1130 289                  | T                                    | 8 (7+1)              | 2-1                  |
| <b>15</b>       | F             | 38              | 50                | 67                | 1a                    | 234 563                   | Se                                   | 7 (5+2)              | 1-1                  |
| <b>16</b>       | F             | 47              | 63                | 42                | 1a                    | 1 077 776                 | DA                                   | 13 (9+4)             | 2-3                  |
| <b>17</b>       | M             | 67              | 70                | 186               | 1b                    | 15 400                    | D                                    | 6 (4+2)              | 1-2                  |
| <b>18</b>       | M             | 32              | 55                | 202               | 1b                    | 185 000                   | D                                    | 9 (6+3)              | 2-2                  |
| <b>19</b>       | F             | 72              | 56                | 45                | 1b                    | 9 070 000                 | T                                    | 8 (6+2)              | 2-1                  |
| <b>20</b>       | M             | 62              | 117               | 216               | 1b                    | 1 550 000                 | D                                    | 14 (10+4)            | 2-3                  |
| <b>21</b>       | M             | 54              | 89                | 86                | 1a                    | 4 485 925                 | Se                                   | 11 (5+6)             | 2-4                  |
| <b>22</b>       | M             | 47              | 56                | 47                | 1b                    | ND                        | Se                                   | 8 (5+3)              | 2-2                  |
| <b>23</b>       | F             | 51              | 22                | 23                | 1b                    | 270 902                   | D                                    | 4 (3+1)              | 1-0                  |
| <b>24</b>       | M             | 45              | 234               | 187               | 1a                    | ND                        | D                                    | 15 (11+4)            | 3-3                  |
| <b>25</b>       | F             | 55              | 115               | 73                | 1b                    | 3 160 000                 | T                                    | 14 (9+5)             | 3-3                  |
| <b>26</b>       | M             | 47              | 57                | 99                | 1B                    | 2 800 000                 | DA                                   | 9 (7+2)              | 2-1                  |

Supplementary Table 1 continued

| Patients | Gender | Age (ys) | AST (UI/L) | ALT (UI/L) | Viral genotype | Viral load (UI/ml) | Risk factor for HCV infection | Knodell (HAI) | METAVIR (A-F) |
|----------|--------|----------|------------|------------|----------------|--------------------|-------------------------------|---------------|---------------|
| 27       | F      | 55       | ND         | ND         | 4              | ND                 | D                             | 5 (5+0)       | 1-0           |
| 28       | M      | 62       | 74         | 84         | 1b             | 4 250 000          | D                             | 10 (7+3)      | 2-2           |
| 29       | F      | 72       | 23         | 22         | 2c             | ND                 | D                             | 5 (3+2)       | 1-1           |
| 30       | F      | 48       | 43         | 47         | 1a             | 11 200 000         | DA                            | 11 (8+3)      | 2-3           |
| 31       | F      | 55       | 51         | 56         | 1a             | 82 400 000         | D                             | 13 (9+4)      | 2-3           |
| 32       | F      | 58       | 20         | 25         | 1b             | 2 110 000          | D                             | 5 (3+2)       | 1-1           |
| 33       | M      | 55       | 26         | 28         | 1b             | ND                 | D                             | 11 (8+3)      | 2-2           |
| 34       | F      | 68       | 69         | 49         | 1b             | 5 540 000          | D                             | 14 (10+4)     | 3-3           |
| 35       | M      | 53       | 60         | 116        | 1a             | 30 500             | DA                            | 10 (8+2)      | 2-1           |
| 36       | M      | 59       | 28         | 31         | ND             | 343                | T                             | 9 (6+3)       | 2-2           |
| 37       | F      | 41       | 44         | 52         | 1b             | 21 200 000         | T                             | 9 (8+1)       | 2-1           |
| 38*      | F      | 44       | 42         | 56         | 1a             | 80 711             | D                             | ND            | ND            |
| 39       | F      | 63       | 39         | 67         | 1a             | 1 170 000          | D                             | 12 (7+5)      | 2-4           |
| 40       | F      | 68       | 296        | 330        | 2a/c           | 20 700 000         | D                             | 14 (11+3)     | 3-2           |
| 41       | M      | 49       | 35         | 48         | 1a             | 21 900 000         | DA                            | 10 (7+3)      | 2-2           |
| 42       | M      | 63       | 26         | 23         | 1b             | 3 850 000          | D                             | 7 (3+4)       | 1-3           |
| 43*      | F      | 60       | 105        | 123        | 1b             | 1 060 000          | D                             | ND            | ND            |
| 44       | M      | 67       | 14         | 10         | 1b             | ND                 | T                             | 9 (7+2)       | 2-1           |
| 45       | M      | 52       | 155        | 305        | 1a             | 1 560 000          | D                             | 10 (7+3)      | 2-2           |
| 46       | F      | 37       | 52         | 89         | 1a             | 3 520              | D                             | 5 (4+1)       | 1-1           |
| 47       | M      | 51       | 25         | 43         | 1a             | 67 500 000         | D                             | 10 (8+2)      | 2-1           |
| 48       | M      | 52       | 104        | 182        | 3a             | 2 850 000          | DA                            | 19 (14+5)     | 3-4           |

F: female, M: male. ND: no data. AST: aspartate aminotransferase, ALT: alanine aminotransferase. Normal ALT and AST levels for adult patients were  $\leq 40$  and  $\leq 42$  IU/L, respectively when testing was done at 37°C. Risk factor for HCV infection: T: transfusion, OE: occupational exposure, DA: drug abuse, Ta: tattoo, H: hemodialysis, Se: sexual, D: unknown. METAVIR: A: inflammatory activity; F: fibrosis stage. \*Patients who have a non-evaluable liver biopsy and therefore no information is available about liver damage.

**SUPPLEMENTARY TABLE 2. qRT-PCR primers description and annealing temperature.**

| Target                          | Primer Sequences (5'-3')                             | Product length (nt) | Annealing Temperature <sup>o</sup> (°C) |
|---------------------------------|------------------------------------------------------|---------------------|-----------------------------------------|
| <b>TNF-<math>\alpha</math></b>  | F CTGCTGCACTTTGGAGTGAT<br>R AGATGATCTGACTGCCTGGG     | 93                  | 60                                      |
| <b>IL-23</b>                    | F AGAAGCTCTGCACACTGGC<br>R CCACACTGGATATGGGGAAC      | 109                 | 60                                      |
| <b>IFN-<math>\gamma</math></b>  | F GAGTGTGGAGACCATCAAGGA<br>R GTATTGCTTTGCGTTGGACA    | 127                 | 58                                      |
| <b>IL-1<math>\beta</math></b>   | F AACAGATGAAGTGCTCCTTCCA<br>R GGTGGTCGGAGATTCGTAGC   | 78                  | 60                                      |
| <b>IL-6</b>                     | F AGTGAGGAACAAGCCAGAGC<br>R GTCAGGGGTGGTTATTGCAT     | 99                  | 60                                      |
| <b>IL-8</b>                     | F AAGTTTTTGAAGAGGGCTGAGA<br>R TTGCTTGAAGTTTCACTGGCAT | 91                  | 60                                      |
| <b>IL-17A</b>                   | F AACGATGACTCCTGGGAAGAC<br>R CCTGGATTCGTGGGATTGTG    | 99                  | 60                                      |
| <b>IL-21</b>                    | F CCAAGGTCAAGATCGCCACA<br>R GGCAGAAATTCAGGGACCAAG    | 99                  | 60                                      |
| <b>IL-10</b>                    | F GCTGTCATCGATTTCTTCCC<br>R ACAAAGCCATGAGTGAGTTTGA   | 111                 | 58                                      |
| <b>TGF-<math>\beta</math></b>   | F CTTCCAGCCGAGGTCCTT<br>R CCCTGGACACCAACTATTGC       | 92                  | 58                                      |
| <b>HPRT</b>                     | F ATGGGAGGCCATCACATTGT<br>R ATGTAATCCAGCAGGTCAGCAA   | 77                  | 60                                      |
| <b><math>\beta</math>-actin</b> | F CCACACTGTGCCCATCTACG<br>R CCGTGTTGGTGAAGCTGTAG     | 131                 | 60                                      |

F: forward primer; R: reverse primer. Thermocycler conditions included 95°C for 10 min, followed by 40 cycles at 95°C for 15 sec and 60 sec at the corresponding annealing temperature. In order to verify the specificity of the PCR products, melting curve analysis was performed from 60°C to 95°C with 0.3°C/sec intervals and stepwise fluorescence acquisition. The efficiency of each qRT-PCR reaction ranged between 0.9 and 1.1.
